# Supplementary material for: High-throughput prediction of MHC Class I and Class II neoantigens with MHCnuggets
Source: bioRxiv or medRxiv preprint supplement (doi:10.1101/752469), 2019-10-04

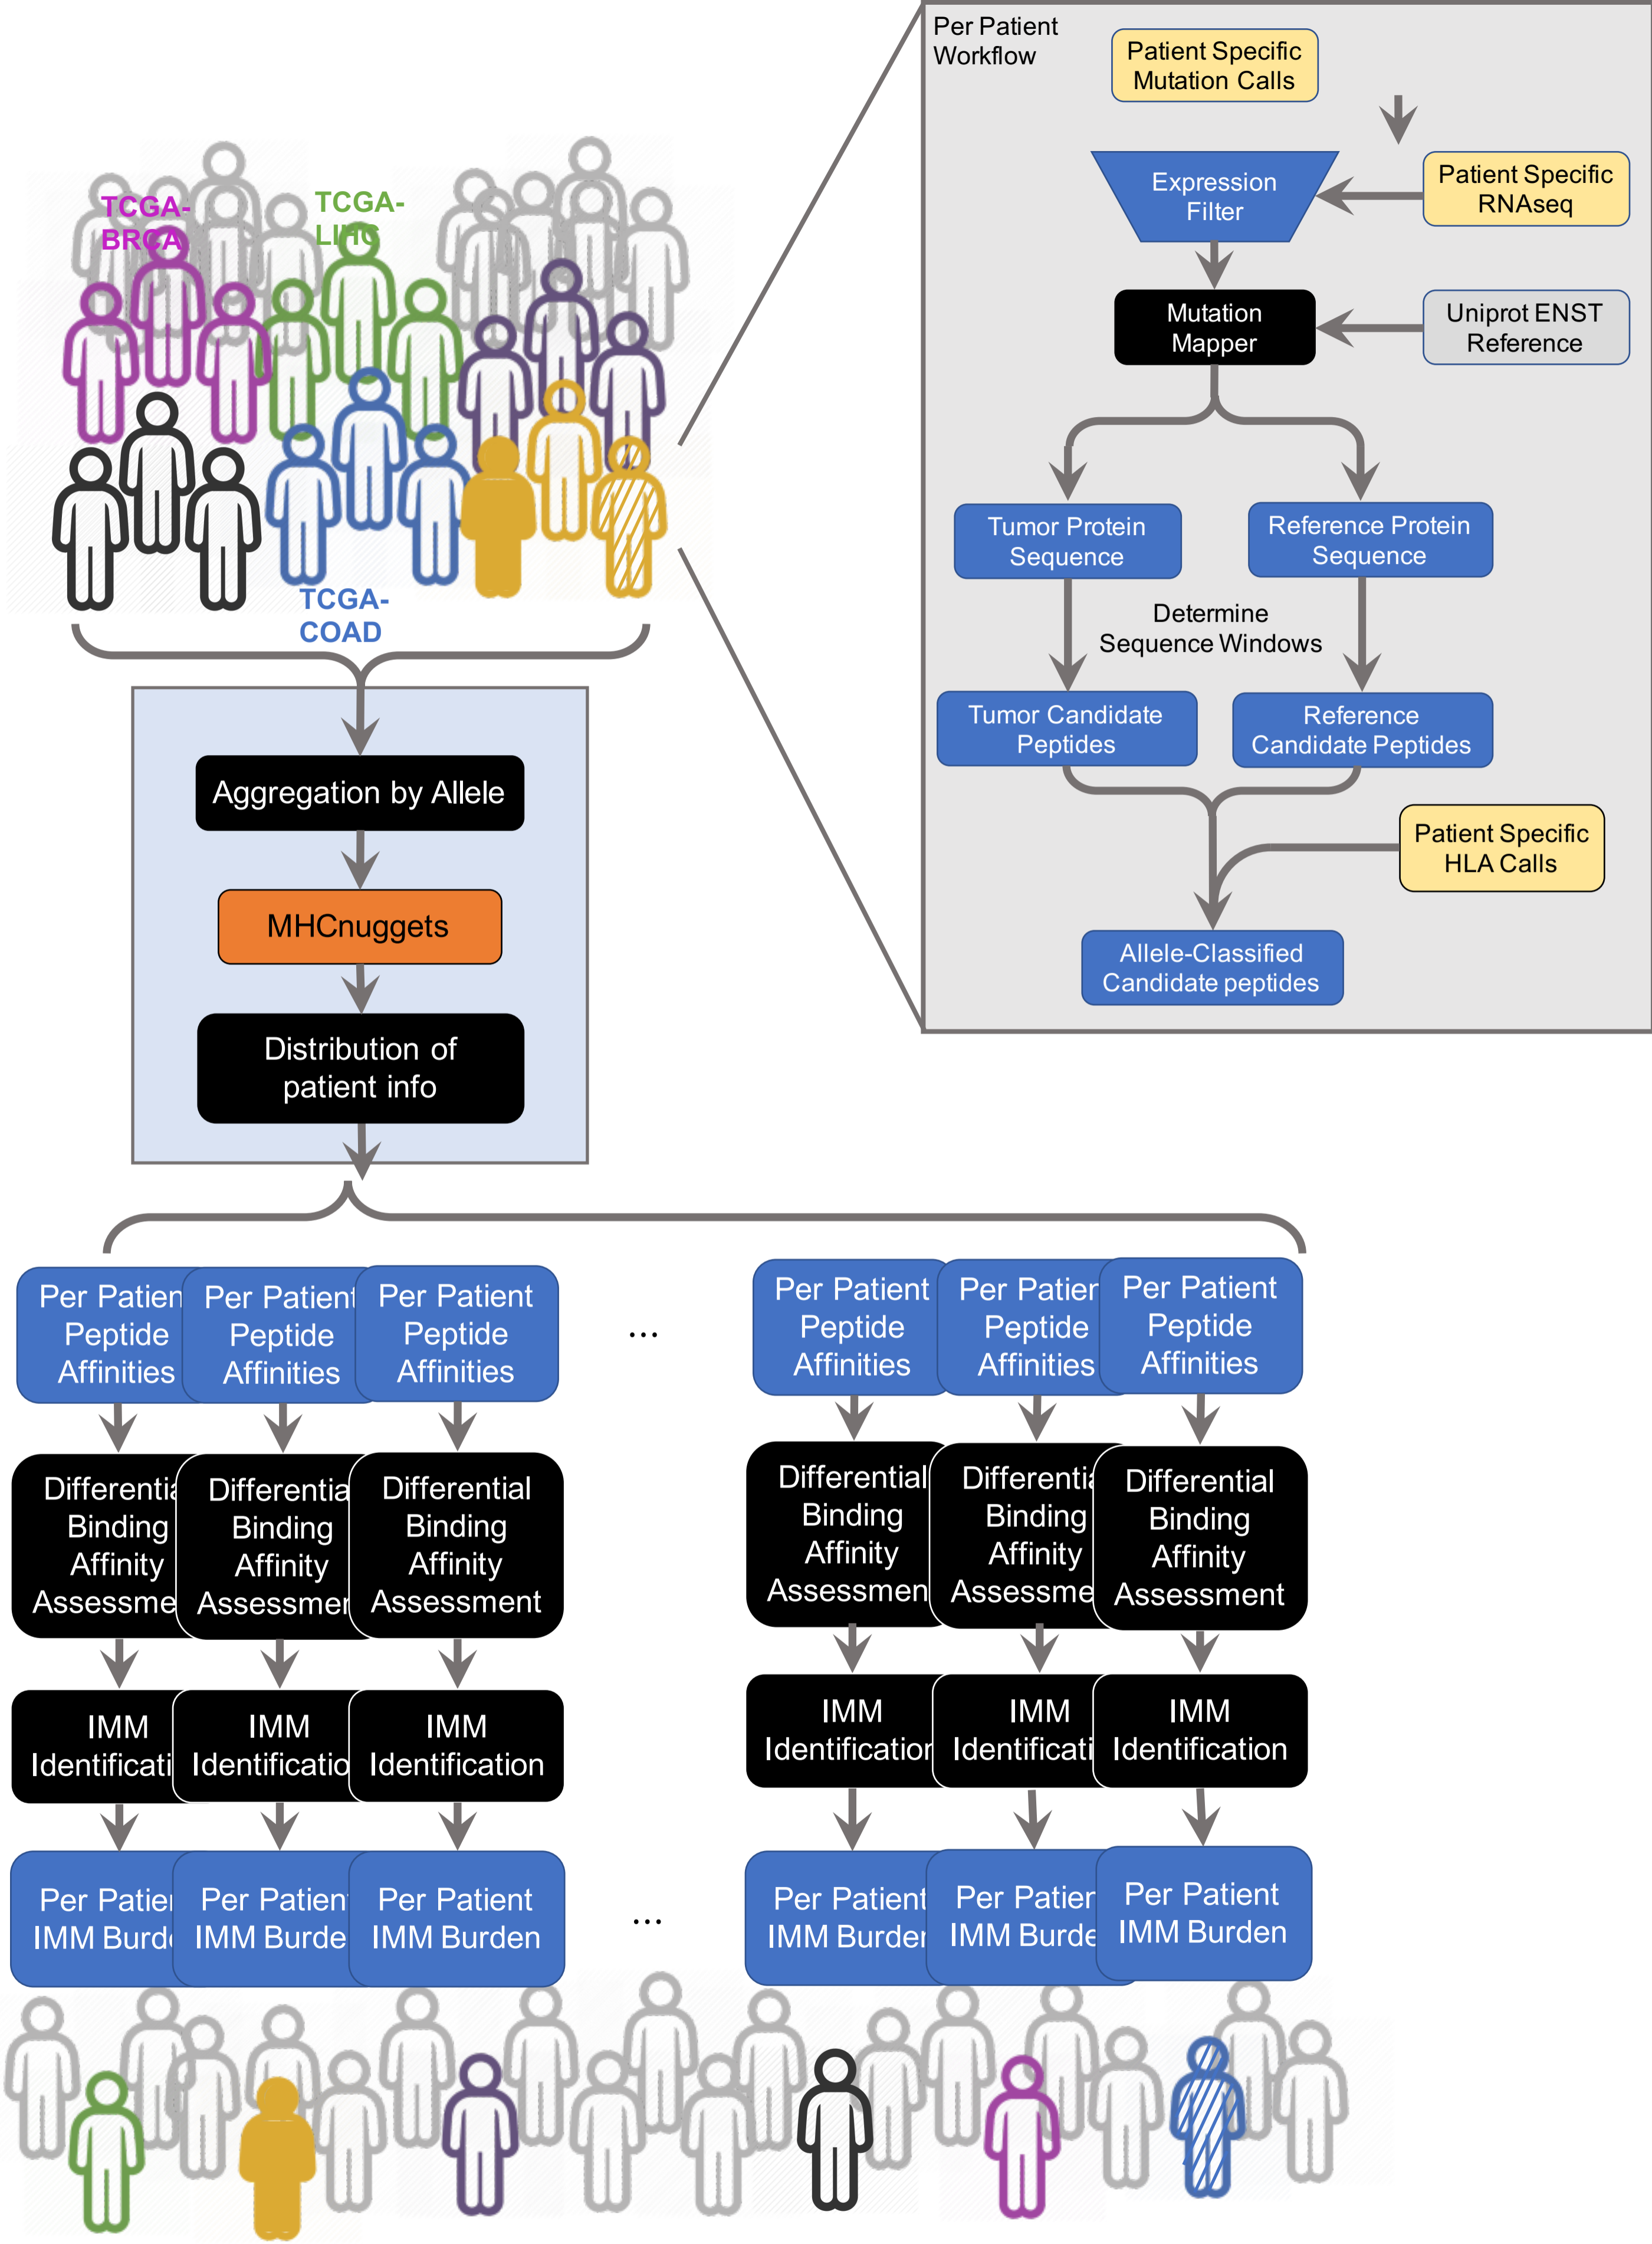

Supplement: Supplementary file [file media-1.pdf]
